# Supplementary material for: The Anti-Apoptotic Bcl-xL Protein, a New Piece in the Puzzle of Cytochrome C Interactome
Source: PubMed Central journal article supplement (PMC3080137; doi:10.1371/journal.pone.0018329), 2011-04-18
Supplement: pone.0018329.s006.pdf [file pone.0018329.s006.pdf]

**Table S3.** HADDOCK active residues for Bcl-x<sub>L</sub> and cytochrome c.

| Bcl-x <sub>L</sub>                                 | cytochrome c                                        |
|----------------------------------------------------|-----------------------------------------------------|
| Q88, E129, D133, T190,<br>F191 <sup>a</sup> , G196 | Q16, V20, G24, H26, G29,<br>G41, A50, K79, M80, V83 |

<sup>a</sup> The residue was considered active although it does not result solvent accessible from NACCESS calculations based on the solution structure 1LXL.
